# Supplementary material for: Radiobiological Assessment of Targeted Radionuclide Therapy with [177Lu]Lu-PSMA-I&T in 2D vs. 3D Cell Culture Models
Source: MDPI journal article supplement (doi:10.3390/ijms242317015), 2023-11-30
Supplement: s1 [file s1]

# Supplementary Information

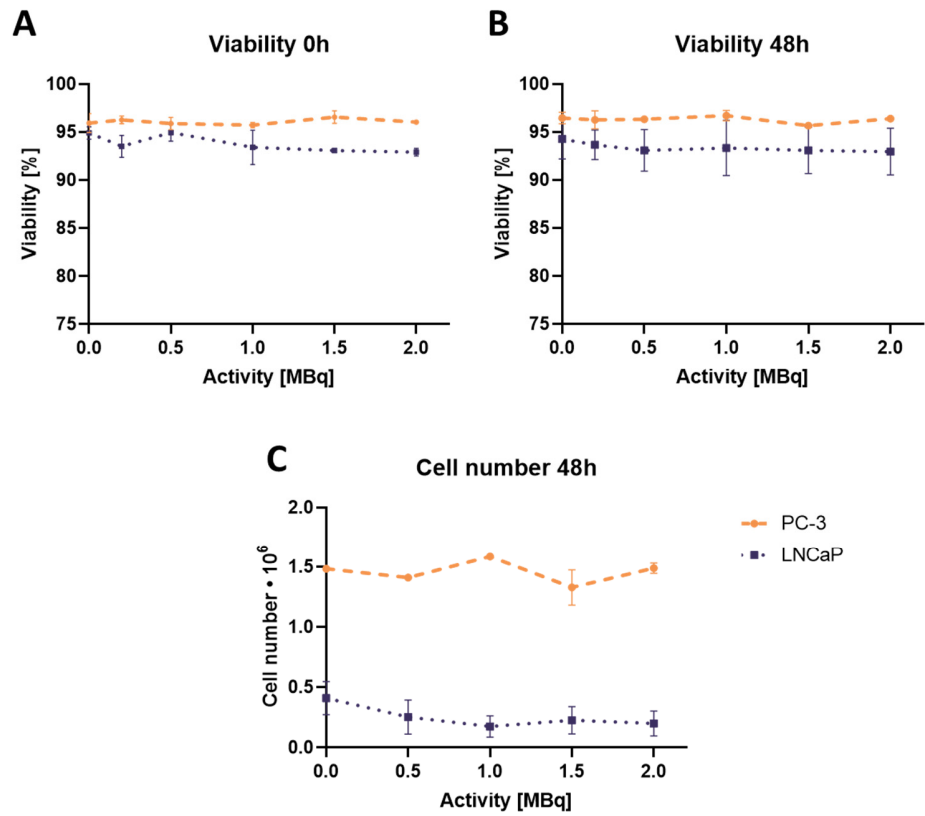

**Figure S1.** Trypan Blue Exclusion Assay: evaluation of cell viability and proliferation in monolayers. Cell viability immediately (0 h; **(A)**) and 48 h (**(B)**) after treatment. Cell count 48 h (**(C)**) after treatment. Graphs are plotted as mean  $\pm$  standard deviation from two independent experiments ( $n = 2$ ) performed in duplicates.

## LNCaP

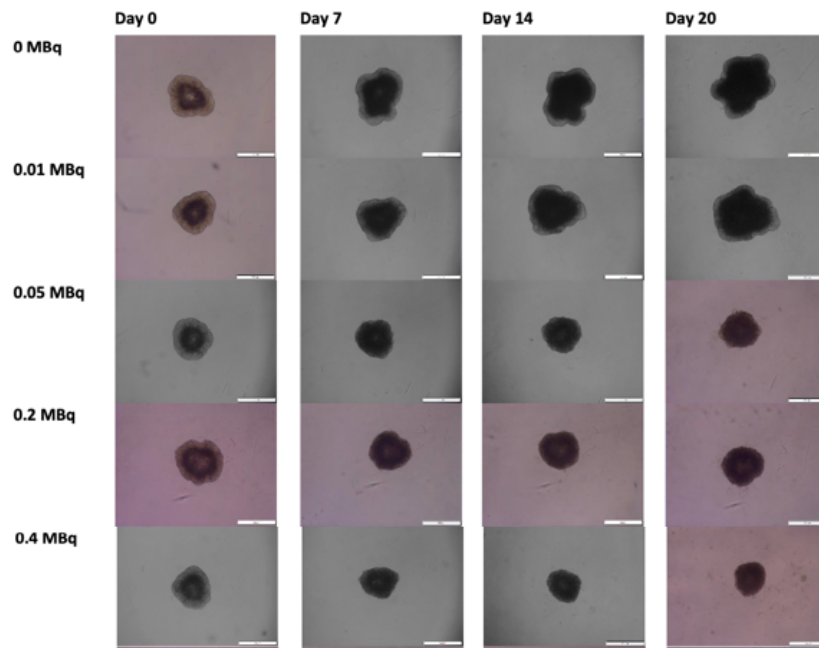

## PC-3

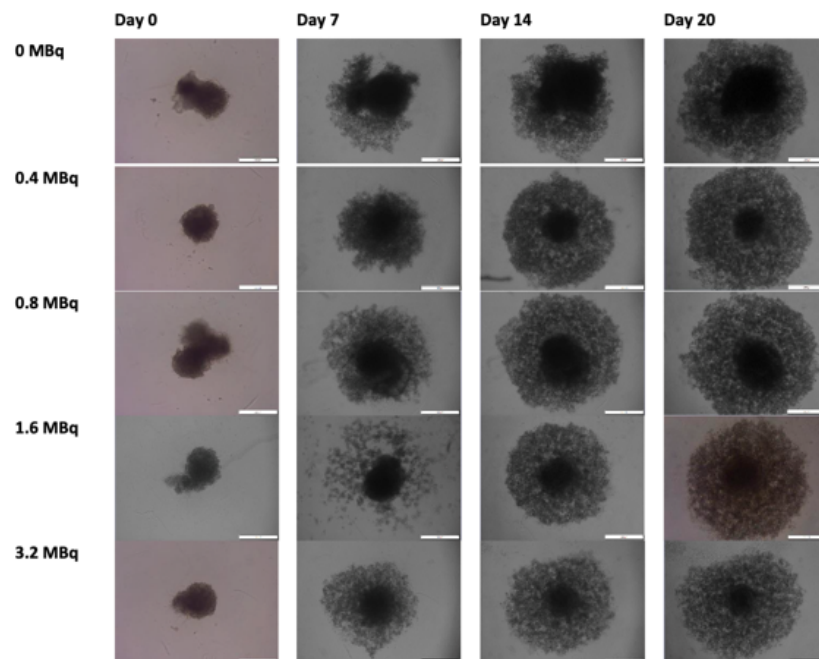

**Figure S2.** Time lapse growth observation of LNCaP and PC-3 spheroids treated with up to 3.2 MBq on day 0; white scale indicates 500  $\mu\text{m}$ .

**Table S1.** Conversion table from applied activity to resulting dose.

| <b>Applied Activity<br/>[MBq]</b> | <b>Resulting Dose 2D<br/>[Gy]</b> | <b>Resulting Dose 3D<br/>[Gy]</b> |
|-----------------------------------|-----------------------------------|-----------------------------------|
| 0.01                              | 0.002                             | 0.05                              |
| 0.05                              | 0.01                              | 0.23                              |
| 0.2                               | 0.05                              | 0.91                              |
| 0.4                               | 0.10                              | 1.82                              |
| 0.5                               | 0.13                              | 2.27                              |
| 0.8                               | 0.20                              | 3.63                              |
| 1.0                               | 0.25                              | 4.54                              |
| 1.5                               | 0.38                              | 6.81                              |
| 1.6                               | 0.40                              | 7.26                              |
| 2.0                               | 0.50                              | 9.08                              |
| 3.2                               | 0.80                              | 14.53                             |
